# Supplementary material for: ZEB1‐mediated melanoma cell plasticity enhances resistance to MAPK inhibitors
Source: PubMed Central journal article supplement (PMC5048365; doi:10.15252/emmm.201505971), 2016-09-05

**Appendix** Richard et al. (EMM-2015-05971)

- Appendix Supplementary Methods
- Appendix Supplementary Figure legends
- Appendix Supplementary Figures S1 to S9

## **Appendix Supplementary Methods**

### **Q-PCR**

The primers used in appendix figures were: human *Tyrosinase*, GCT GCC AAT TTC AGC TTT AGA and CCG CTA TCC CAG TAA GTG GA, human *E-cadherin*, CCC GGG ACA ACG TTT ATT AC and GCT GGC TCA AGT CAA AGT CC, human *Vimentin*, GAC CAG CTA ACC AAC GAC AAA and GAA GCA TCT CCT CCT GCA AT, human *SPARC*, CGA GCT GGA TGA GAA CAA CA and GTT GTC ATT GCT GCA CAC CT, human *AXL*, GGT GGC TGT GAA GAC GAT GA and CTC AGA TAC TCC ATG CCA CT, human *WNT5A*, GCC ATG AAG AAG TCC ATT GG and CTT CAA TTA CAA CCT GG CG.

## Appendix Supplementary figure legends

**Appendix Figure S1: *MITF*, *ZEB1*, *TWIST1* and *ZEB2* mRNA expression levels and IC50 for the BRAFi PLX4720 and the MEKi AZD6244 in *BRAF*<sup>V600</sup>-mutated melanoma cell lines from the CCLE.** IC50 (μM) are indicated. PLX4720 is an analog of PLX4032/vemurafenib. AZD6244/selumetinib is a MEKi for which clinical trials are still ongoing. Cell lines are ranked according to their PLX4032 IC50. Color code: IC50<5μM: green, IC50>5μM: red ; *MITF*, *ZEB1*, *TWIST1* and *ZEB2* expression levels: <7: green, >7: red.

**Appendix Figure S2: *ZEB1* expression levels are higher in *BRAF*<sup>V600</sup> or *NRAS*<sup>Q61R</sup>-mutated melanomas compared to *BRAF*/*NRAS* WT tumors.** Analyses of *ZEB1* expression according to the mutation status of *BRAF*/*NRAS* in the TCGA data set (n=341). (A) Whisker plot of *ZEB1* mRNA expression in *BRAF*<sup>V600</sup>, *NRAS*<sup>Q61R</sup> or *BRAF*/*NRAS* WT melanoma from the TCGA. (B) Histogram showing that 80% of *ZEB1*<sup>high</sup> melanomas exhibit a *BRAF* or *NRAS* mutation, while 50% of *ZEB1*<sup>low</sup> melanomas are *BRAF*/*NRAS* WT. Wilcoxon signed-rank test.

**Appendix Figure S3: *ZEB1* overexpression in SKMEL5 melanoma cells induces switching towards a *MITF*<sup>low</sup>/*p75*<sup>high</sup> stem-like tumor initiating phenotype and promotes resistance to MAPKi** (A) SKMEL5 cells were infected with retroviruses expressing *ZEB1*. Western blot analyses of *ZEB1* and *p75*. GAPDH was used as a loading control. (B) Quantitative PCR analyses of *MITF* and *p75* upon *ZEB1* expression. mRNA expression levels are represented relatively to control cells (mean ± SD, n=3, Student's t-test). (C) Soft agar colony formation assay upon *ZEB1* expression. Scale bar = 200 μM. Histograms represent

quantitative analyses (mean  $\pm$  SD, n=3). (D) FACS analyses of p75 expression upon *ZEB1* expression, after 10 days treatment with 300 nM PLX4032. Bar chart representing the mean percentage of p75-high, int, low and negative cells from 2 independent experiments (Fisher's Exact Test). (E) Clonogenic assay +/- PLX4032 (300 nM), +/- GDC-0973 (5 nM) treatment for 10 days. The graphs represent the mean number of colonies in 3 independent experiments. (Student's t test).

**Appendix Figure S4: The levels of ZEB2 are decreased while the levels of invasion markers are induced in ZEB1-overexpressing A375 cells.** (A) ZEB2 expression assessed by Western-blot and Q-PCR analyses upon *ZEB1* expression in A375 cells. GAPDH was used as a loading control. Of note, ZEB2 antibody also recognizes exogenously expressed ZEB1, which can be distinguished from endogenous ZEB2 by its higher molecular weight. (n=3, Student's t-test). (B) Q-PCR analyses of *Vimentin*, *SPARC*, *MMP1*, *AXL* and *WNT5A* upon *ZEB1* expression in A375 cells. mRNA expression levels are represented relatively to control cells (mean  $\pm$  SD, n=3, Student's t-test). AXL was undetectable. n.s: non significant.

**Appendix Figure S5: p75 mRNA expression is positively correlated with ZEB1 in human melanoma samples.** Pearson correlation between *ZEB1* and *p75* mRNA expression in the TCGA data set (n=467).

**Appendix Figure S6: ZEB1 knock-down in A375 cells results in increased ZEB2 and E-cadherin expression levels.** ZEB2 and E-cadherin expression levels were analyzed by western blot or Q-PCR upon *ZEB1* knock-down in A375 cells. mRNA expression levels are represented relatively to control cells (mean  $\pm$  SD, n=3, Student's t-test).

**Appendix Figure S7: PLX4032 IC50 values are not significantly modified upon *ZEB1* expression in A375, C-09.10 and GLO cells.** Mean IC50 values ( $\mu\text{M}$ ) from 3 experiments determined by ATP assays after 3 days of exposure to the drug.

**Appendix Figure S8: AXL expression levels are increased in BRAFi resistant models.** Western blot analyses of AXL in A375-R and SKMEL5-R *versus* the parental naive cells, and in GOKA and ESP cells. Actin was used as a loading control.

**Appendix Figure S9: The ectopic expression of *TWIST1* in A375, SKMEL5 and 501MEL melanoma cells does not affect their colony forming capacity.** A375, SKMEL5 and 501MEL cells were infected with retroviruses expressing *TWIST1*. Soft agar colony formation assays upon *TWIST1* expression showing no significant difference compared to control cells. (n=3, Student's t test). n.s: non significant.

Appendix Figure S1

| Cell line | BRAF status | IC50    |         | MITF   | ZEB1  | TWIST1 | ZEB2  |
|-----------|-------------|---------|---------|--------|-------|--------|-------|
|           |             | PLX4720 | AZD6244 |        |       |        |       |
| WM88      | BRafV600    | 0,204   | 0,051   | 10,050 | 7,023 | 10,055 | 5,678 |
| UACC62    | BRafV600    | 0,250   | 0,035   | 9,496  | 6,795 | 9,947  | 7,957 |
| A375      | BRafV600    | 0,258   | 0,107   | 7,636  | 6,976 | 9,361  | 4,433 |
| MALME3M   | BRafV600    | 0,286   | 0,046   | 10,960 | 4,964 | 8,285  | 6,698 |
| MELHO     | BRafV600    | 0,313   | 0,108   | 11,149 | 4,937 | 7,993  | 5,733 |
| SKMEL5    | BRafV600    | 0,369   | 0,169   | 10,970 | 5,103 | 9,517  | 5,990 |
| WM983B    | BRafV600    | 0,511   | 0,088   | 10,053 | 4,524 | 10,098 | 7,070 |
| COLO679   | BRafV600    | 0,554   | 0,123   | 10,335 | 5,353 | 10,953 | 5,354 |
| RVH421    | BRafV600    | 0,771   | 0,257   | 10,445 | 6,511 | 8,977  | 5,936 |
| IGR37     | BRafV600    | 0,904   | 0,213   | 10,847 | 3,964 | 10,445 | 6,644 |
| UACC257   | BRafV600    | 1,064   | 0,234   | 10,996 | 4,321 | 7,833  | 7,957 |
| WM1799    | BRafV600    | 1,226   | 0,351   | 10,004 | 6,812 | 10,222 | 6,825 |
| G361      | BRafV600    | 1,287   | 0,419   | 10,831 | 4,805 | 10,403 | 7,216 |
| HT144     | BRafV600    | 1,336   | 0,374   | 9,477  | 6,528 | 9,514  | 7,239 |
| WM2664    | BRafV600    | 1,579   | 0,165   | 10,433 | 6,545 | 6,007  | 7,321 |
| HS939T    | BRafV600    | 2,103   | 0,494   | 9,724  | 5,563 | 10,040 | 6,841 |
| K029AX    | BRafV600    | 2,111   | 0,459   | 10,466 | 4,624 | 7,392  | 7,191 |
| C32       | BRafV600    | 2,207   | 1,360   | 9,984  | 5,881 | 9,861  | 6,251 |
| MDAMB435S | BRafV600    | 2,313   | 0,422   | 7,947  | 6,302 | 9,300  | 6,642 |
| COLO741   | BRafV600    | 4,040   | 2,675   | 10,969 | 5,088 | 7,969  | 7,491 |
| SKMEL24   | BRafV600    | 5,155   | 2,313   | 7,357  | 6,612 | 8,475  | 7,358 |
| HS695T    | BRafV600    | 7,265   | 8       | 6,354  | 7,728 | 8,538  | 4,466 |
| LOXIMM    | BRafV600    | 8       | 0,590   | 5,681  | 8,573 | 8,585  | 6,217 |
| RPMI7951  | BRafV600    | 8       | 8       | 6,201  | 9,207 | 10,103 | 5,820 |
| WM793     | BRafV600    | 8       | 8       | 6,389  | 6,674 | 9,797  | 5,408 |
| WM115     | BRafV600    | 8       | 8       | 6,847  | 6,618 | 10,725 | 6,859 |
| IGR39     | BRafV600    | 8       | 8       | 7,645  | 7,155 | 9,094  | 5,073 |
| A2058     | BRafV600    | 8       | 5,036   | 8,709  | 6,761 | 9,225  | 5,369 |

Appendix Figure S2

**A**

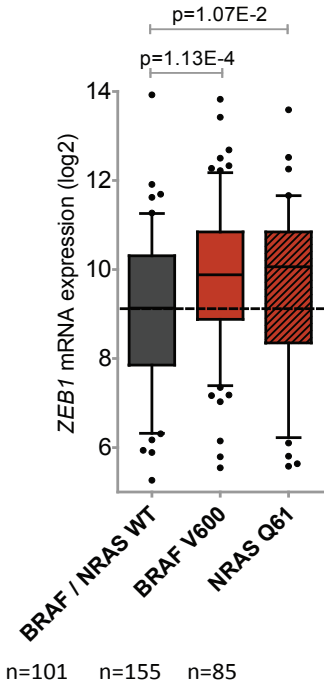

**B**

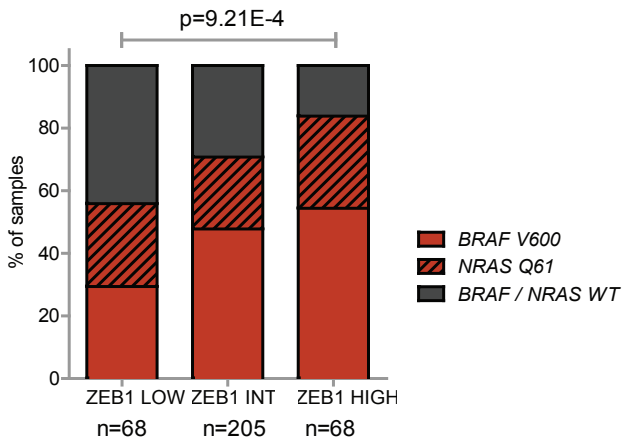

### Appendix Figure S3

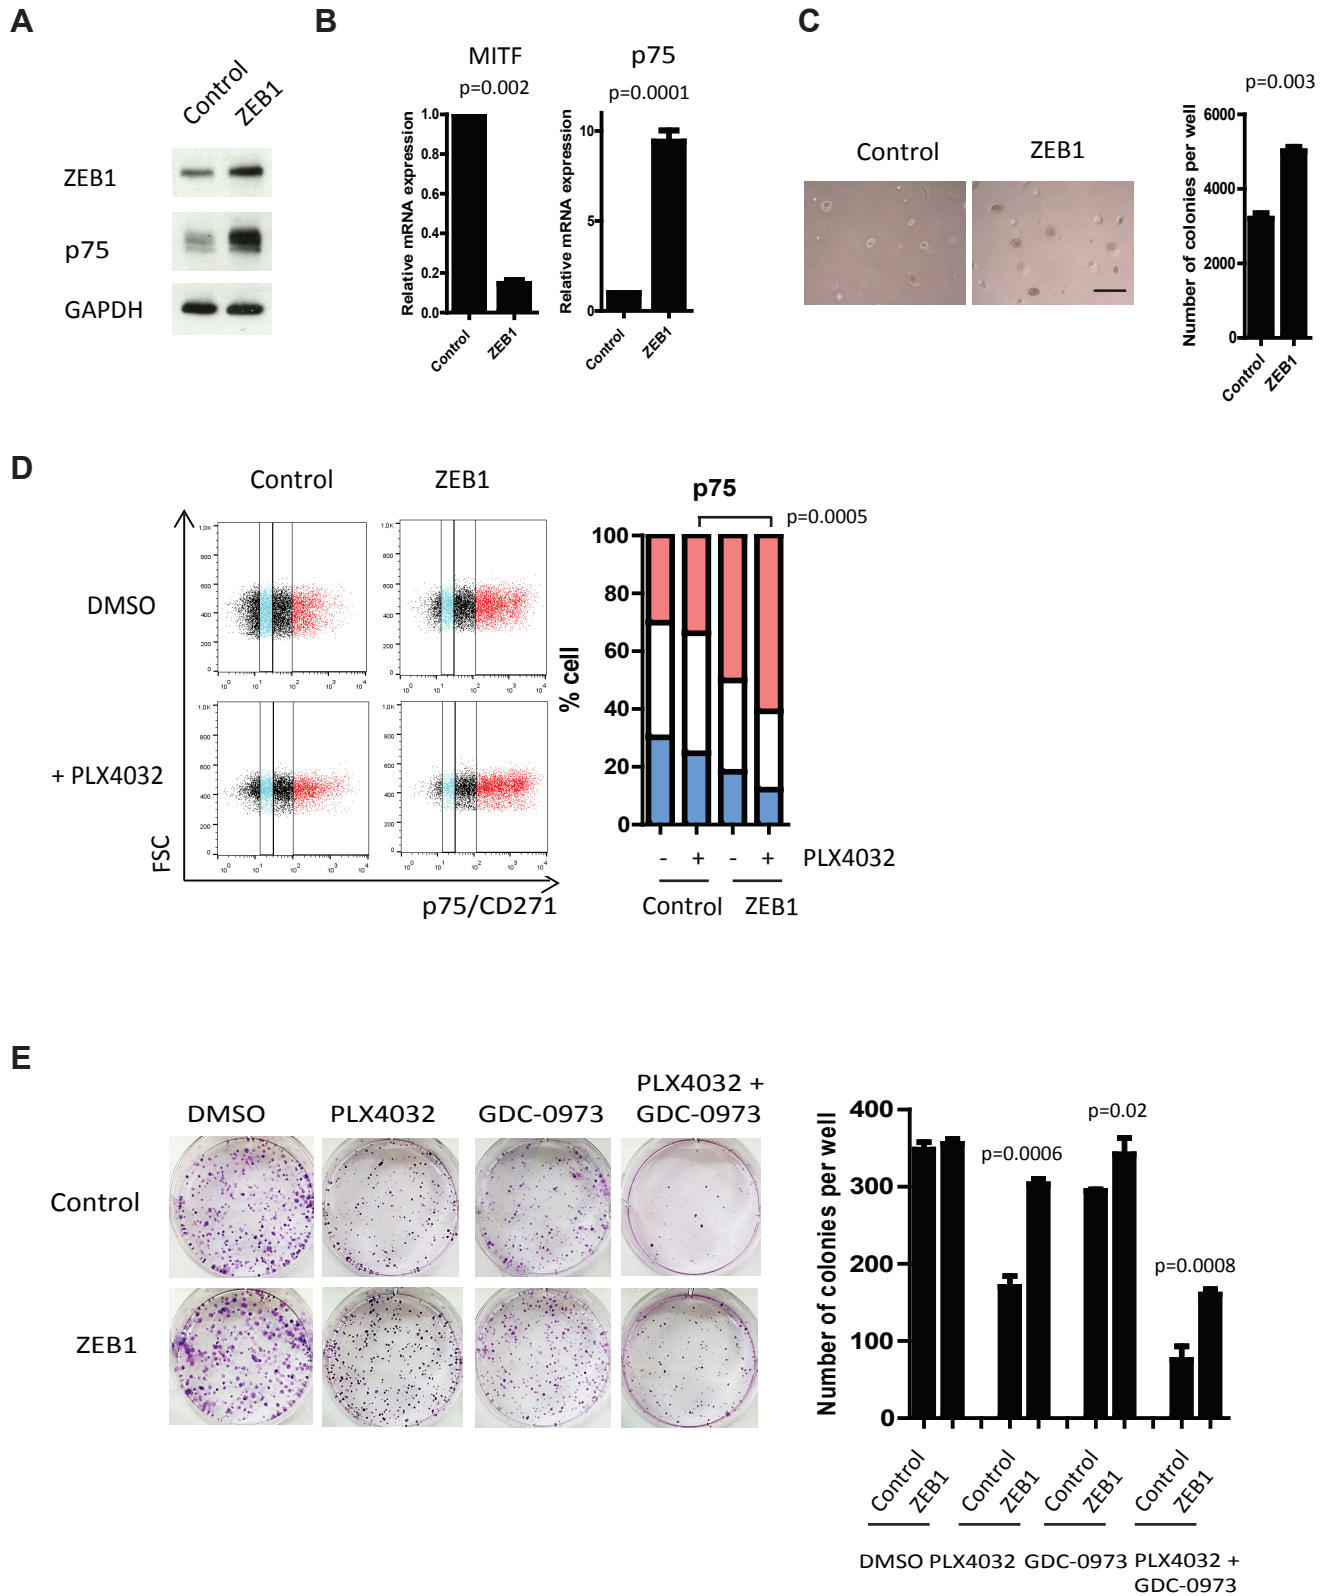



# Appendix Figure S4

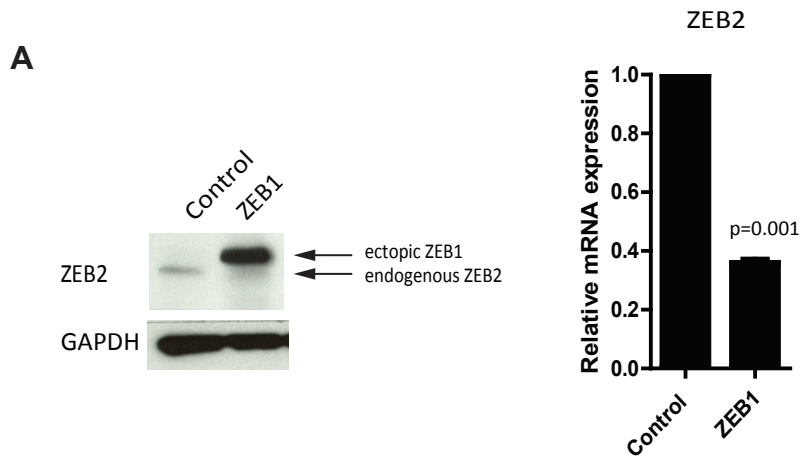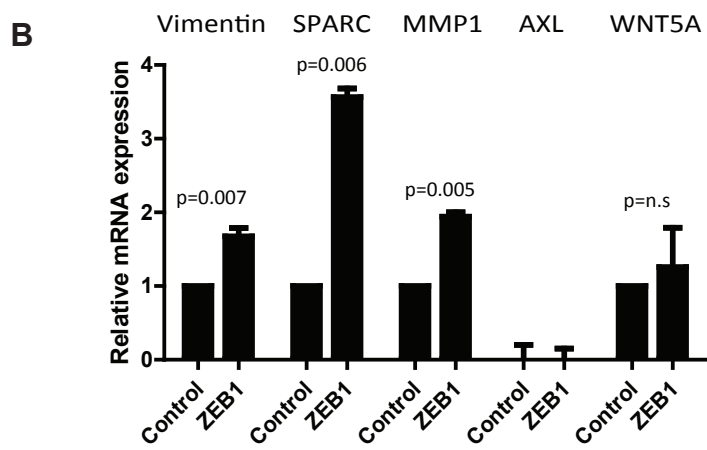

Appendix Figure S5

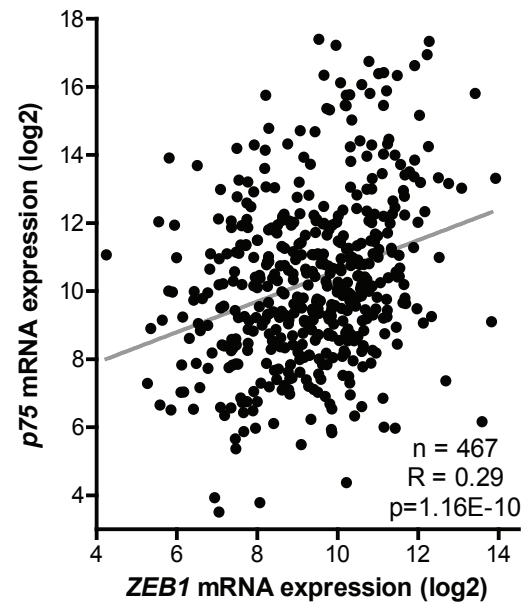

## Appendix Figure S6

**A**

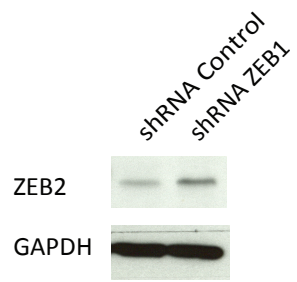

**B**

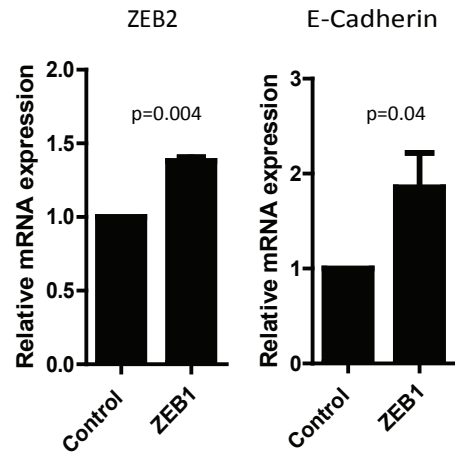

## Appendix Figure S7

| PLX4032 IC50 ( $\mu\text{M}$ ) | A375 | C-09.10 | GLO  |
|--------------------------------|------|---------|------|
| Control                        | 0,20 | 0,11    | 0,14 |
| ZEB1                           | 0,61 | 0,18    | 0,22 |

Appendix Figure S8

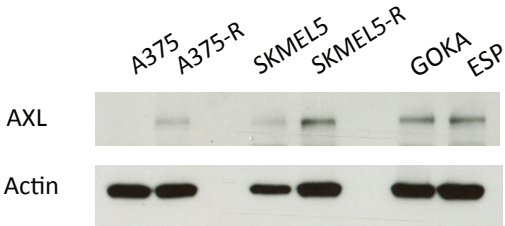

## Appendix Figure S9

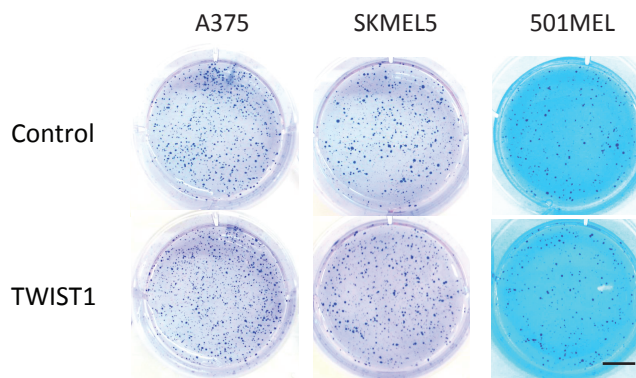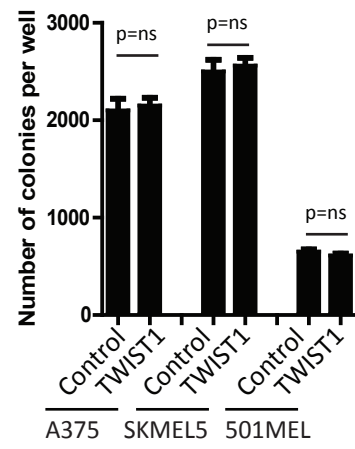

Supplement: EMMM-8-1143-s001.pdf [file EMMM-8-1143-s001.pdf]
