# Supplementary material for: ZEB1‐mediated melanoma cell plasticity enhances resistance to MAPK inhibitors
Source: PubMed Central journal article supplement (PMC5048365; doi:10.15252/emmm.201505971), 2016-09-05
Supplement: EMMM-8-1143-s002.pdf [file EMMM-8-1143-s002.pdf]

## Expanded View Figures

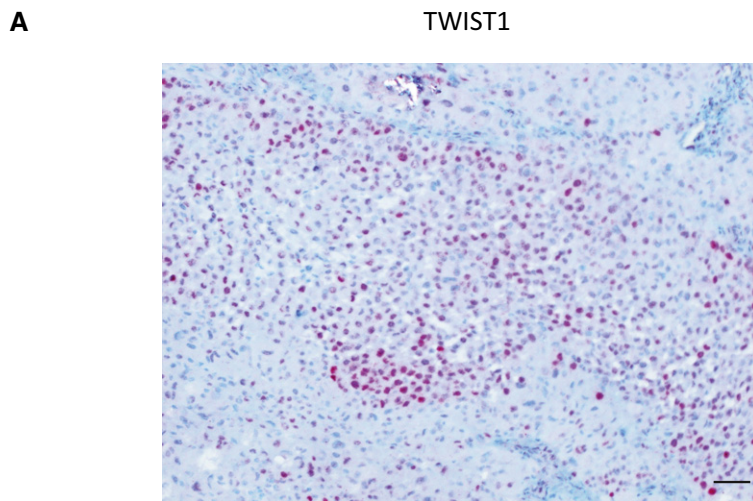

**Figure EV1. TWIST1 expression levels are frequently elevated in *BRAF*<sup>V600</sup> melanoma patients upon vemurafenib treatment.**

- A Representative picture of TWIST1 immunostaining in the bulk of primary melanoma. Scale bar = 40  $\mu$ m.
- B Representative pictures of TWIST1 immunostaining before and after vemurafenib treatment in patient 4. Scale bar = 40  $\mu$ m.
- C ZEB1 and TWIST1 immunostainings in the tumor from the patient from which ESP cells had been derived, before treatment with vemurafenib. Scale bar = 80  $\mu$ m.

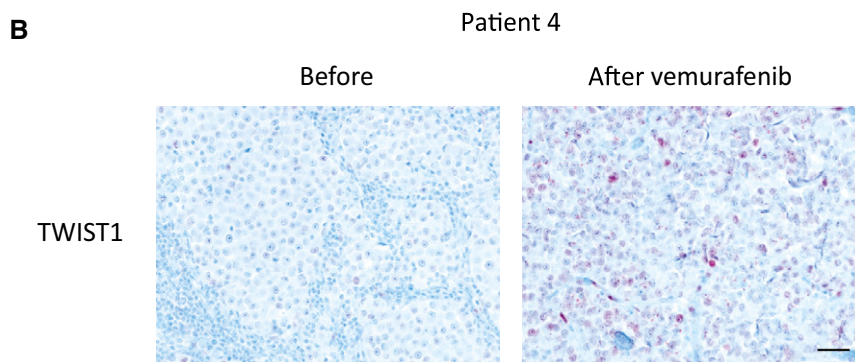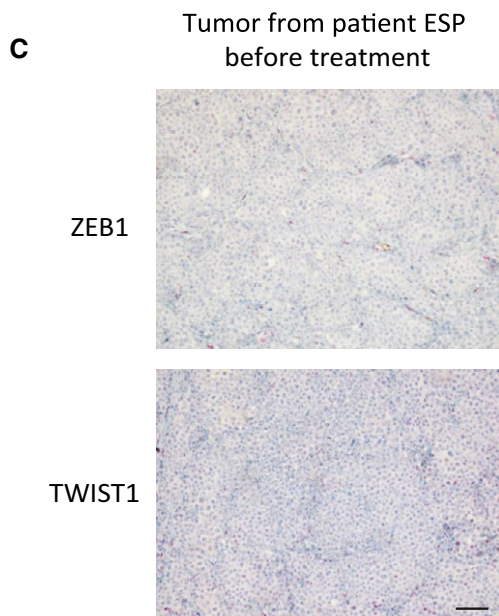

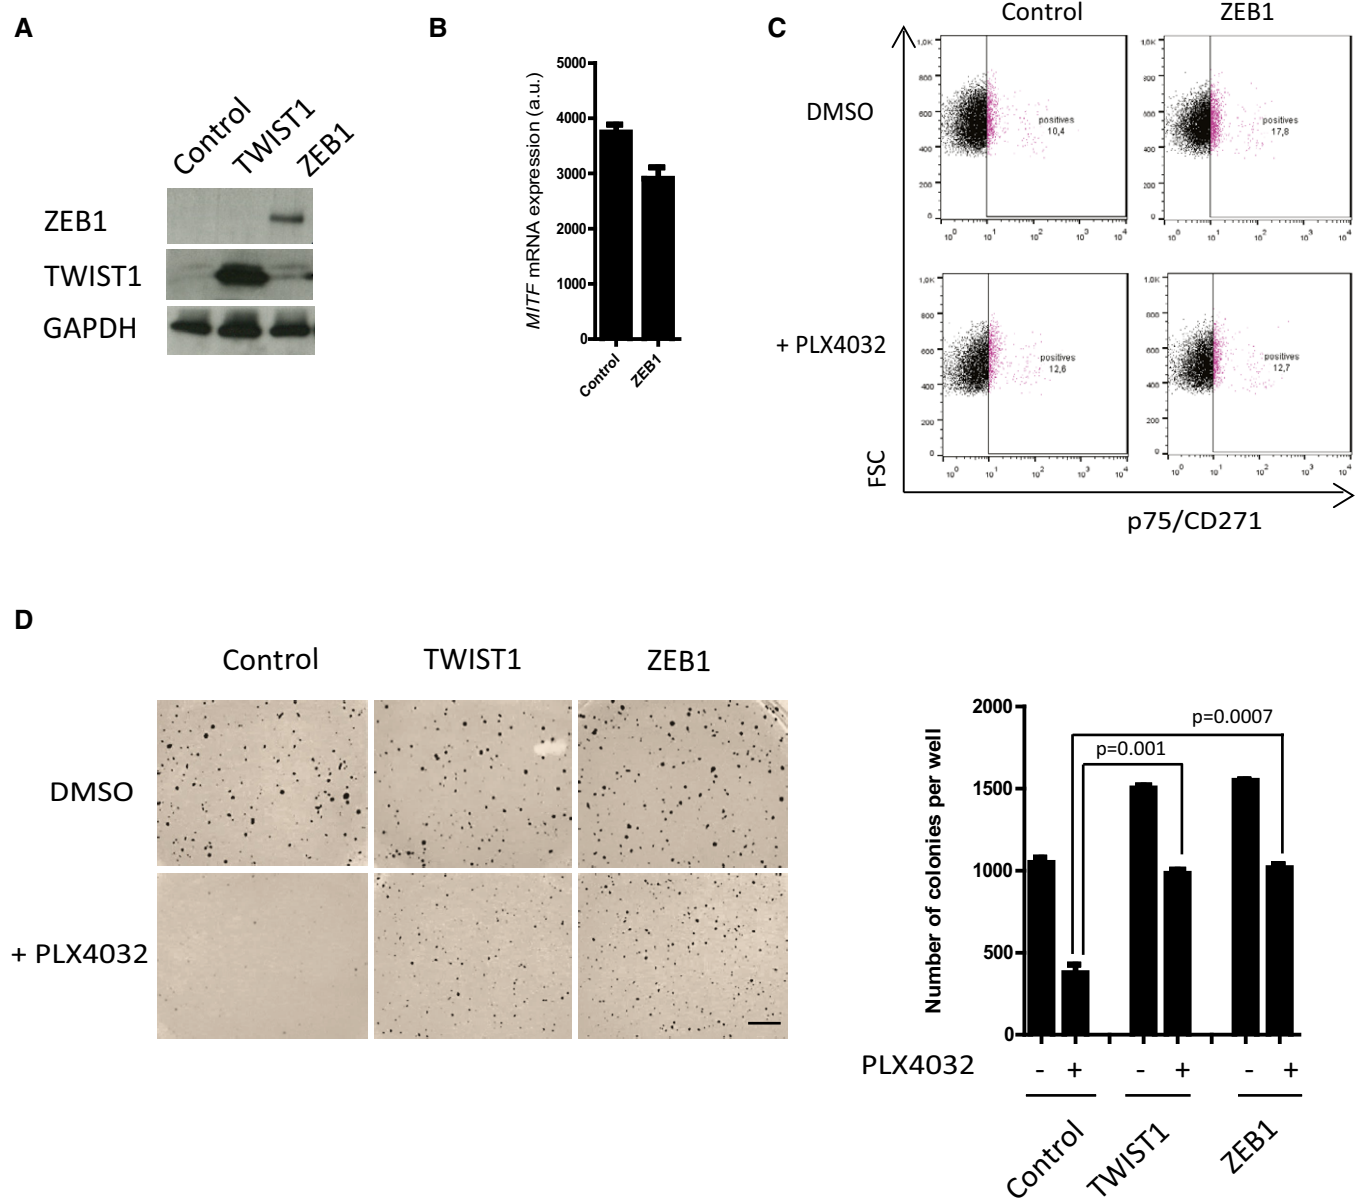

**Figure EV2. The ectopic expression of *TWIST1* or *ZEB1* in the *ZEB1*<sup>low</sup> 501MEL cell line promotes BRAFi resistance.**

- A 501MEL cells were infected with retroviruses expressing either *TWIST1* or *ZEB1*. Western blot analyses of *ZEB1* and *TWIST1*. GAPDH was used as a loading control.
- B Quantitative PCR analyses of *MITF* expression upon *ZEB1* ectopic expression (mean  $\pm$  SD,  $n = 3$ ).
- C FACS analyses of p75 expression upon *ZEB1* ectopic expression, after 10 days with or without 100 nM PLX4032 treatment, showing that p75 is not induced in either of these conditions.
- D Soft agar colony formation assay in the presence or absence of PLX4032 (100 nM). Scale bar = 500  $\mu$ m. The graph represents the mean number of colonies ( $\pm$  SD) in three independent experiments (Student's *t*-test).

Source data are available online for this figure.

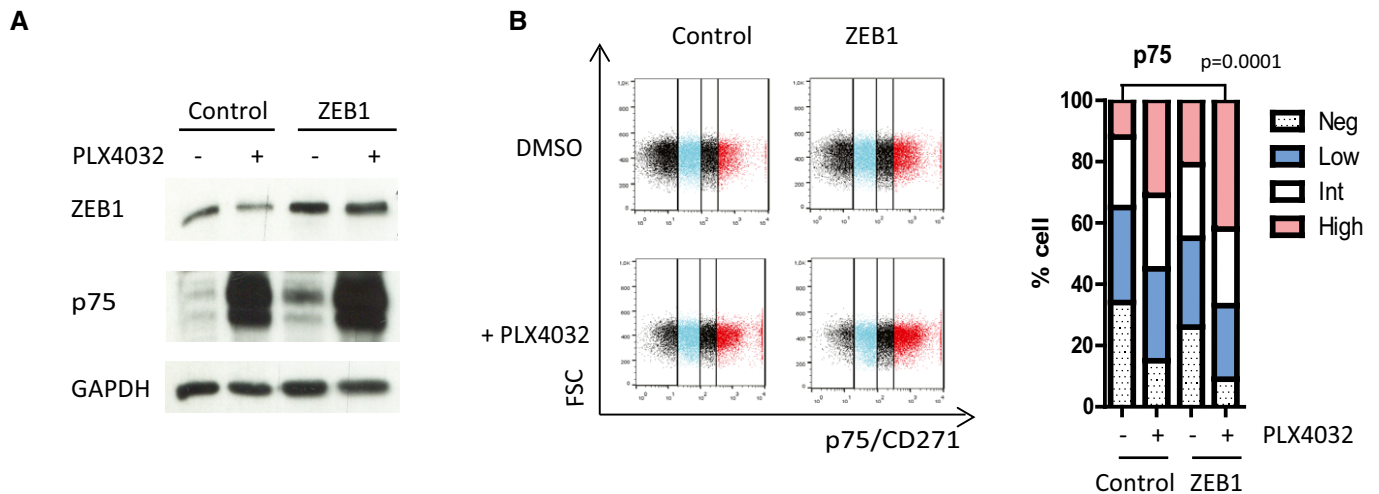

**Figure EV3. ZEB1 ectopic expression in ZEB1<sup>low</sup> patient-derived short-term culture GLO cells promotes a p75<sup>high</sup> phenotype.**

A GLO short-term culture cells were infected with retroviruses expressing ZEB1. Western blot analyses of ZEB1 and p75 in the presence or absence of PLX4032 (100 nM). GAPDH was used as a loading control.

B FACS analyses of p75 expression upon ZEB1 ectopic expression, after 10 days with or without 100 nM PLX4032 treatment. Bar chart representing the mean percentage of p75<sup>high</sup>, p75<sup>int</sup>, p75<sup>low</sup>, and p75<sup>negative</sup> cells from two independent experiments (Fisher's exact test).

Source data are available online for this figure.

**Figure EV4. ZEB1 knockdown in SKMEL5 cells promotes a p75<sup>low</sup> phenotype and sensitizes cells to BRAFi.**

A SKMEL5 cells were infected with retroviruses expressing a control or shRNA-ZEB1. Western blot analyses of ZEB1 and p75 upon ZEB1 knockdown. GAPDH was used as a loading control.

B FACS analyses of p75 cell surface expression upon ZEB1 knockdown. Bar chart representing the mean percentage of p75<sup>high</sup>, p75<sup>int</sup>, and p75<sup>low</sup> cells from two independent experiments.

C Soft agar colony formation assay in the presence or absence of PLX4032 (300 nM). Scale bar = 100  $\mu$ m. Histograms represent quantitative analyses (mean  $\pm$  SD,  $n = 3$ , Student's  $t$ -test).

D  $2 \times 10^6$  SKMEL5 cells expressing an IPTG-inducible shRNA control or shRNA-ZEB1 were injected subcutaneously into nude mice. When the tumor reached 5 mm in diameter, ZEB1 expression was silenced by providing mice with IPTG (10 mM) in their drinking water and orally administering vemurafenib (50 mg/kg) on a daily basis for 15 days. The mean tumor volume for five mice is represented ( $\pm$  s.e.m.) (Student's  $t$ -test,  $P$  at 21 days). ns: nonsignificant.

Source data are available online for this figure.

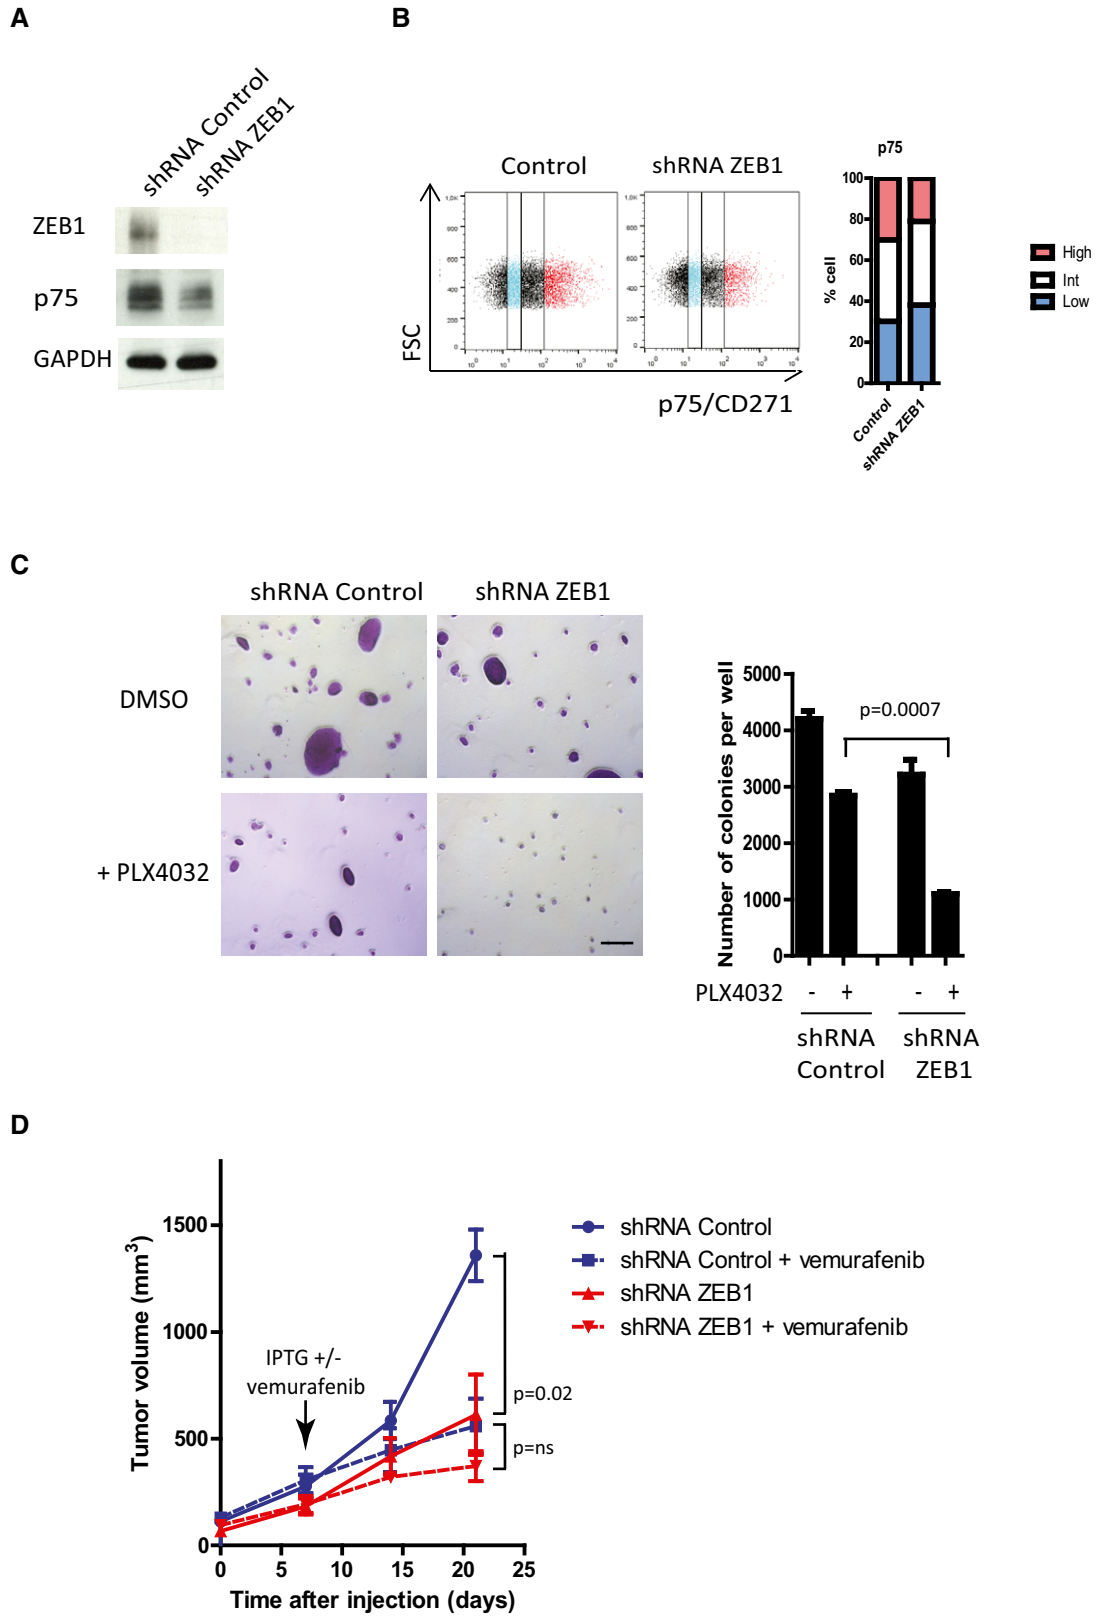

Figure EV4.
