# Supplementary material for: ZEB1‐mediated melanoma cell plasticity enhances resistance to MAPK inhibitors
Source: PubMed Central journal article supplement (PMC5048365; doi:10.15252/emmm.201505971), 2016-09-05

Source Data Figure 6

**A**

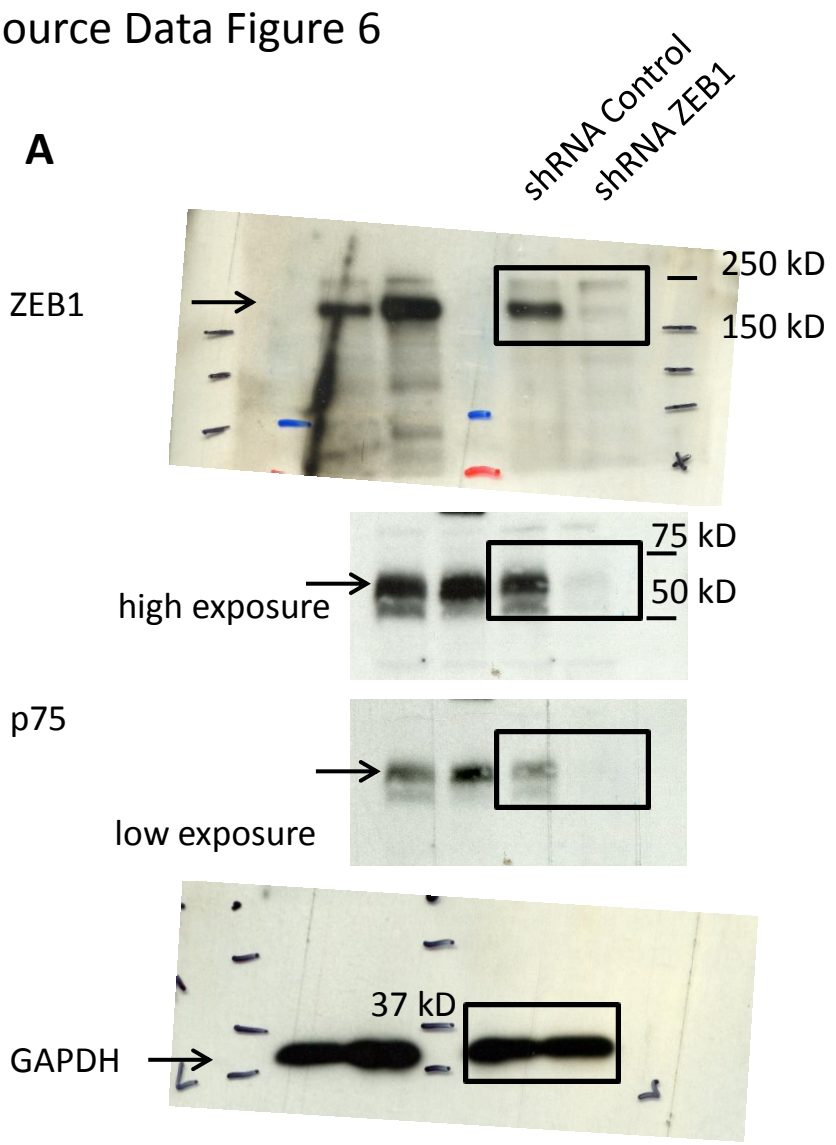

**F**

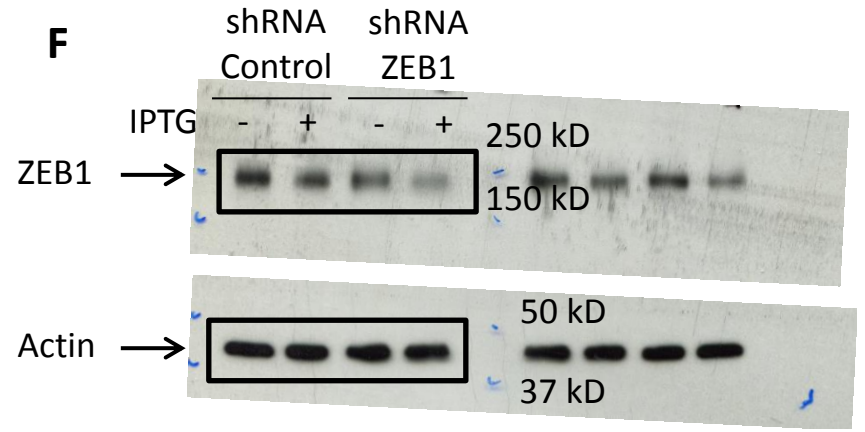

**G**

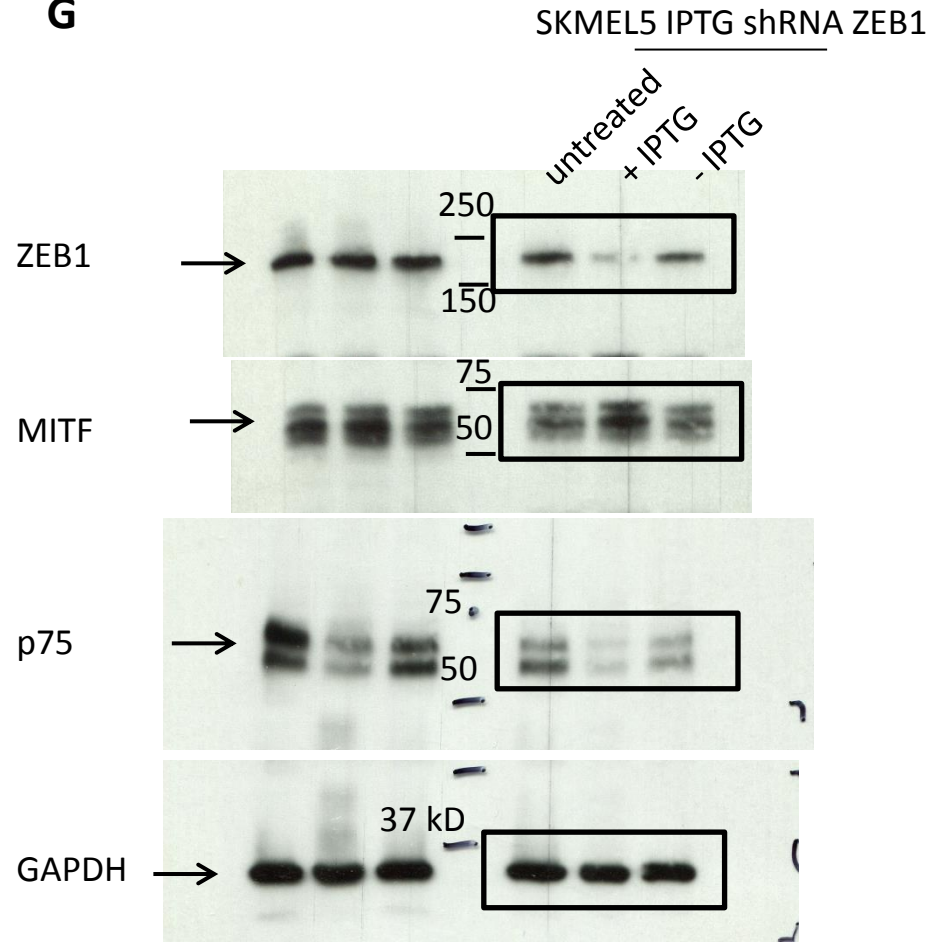

Supplement: EMMM-8-1143-s007.pdf [file EMMM-8-1143-s007.pdf]
